# Supplementary material for: Novel Microdialysis Technique Reveals a Dramatic Shift in Metabolite Secretion during the Early Stages of the Interaction between the Ectomycorrhizal Fungus Pisolithus microcarpus and Its Host Eucalyptus grandis
Source: MDPI journal article supplement (doi:10.3390/microorganisms9091817), 2021-08-26
Supplement: s1 [file s1]

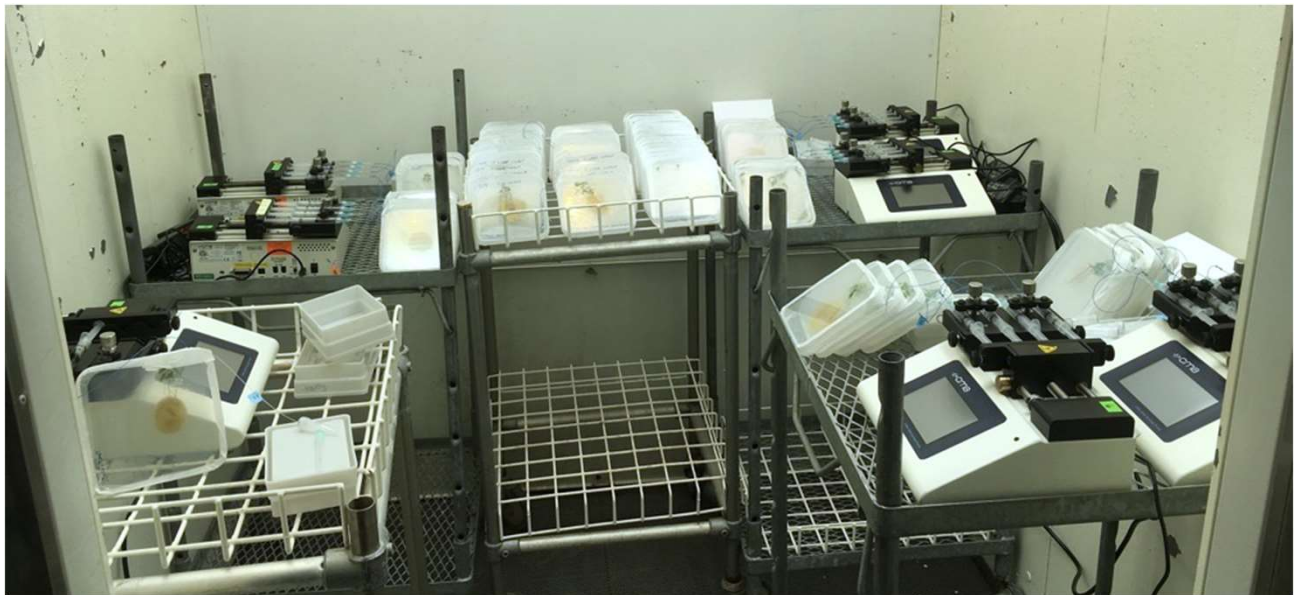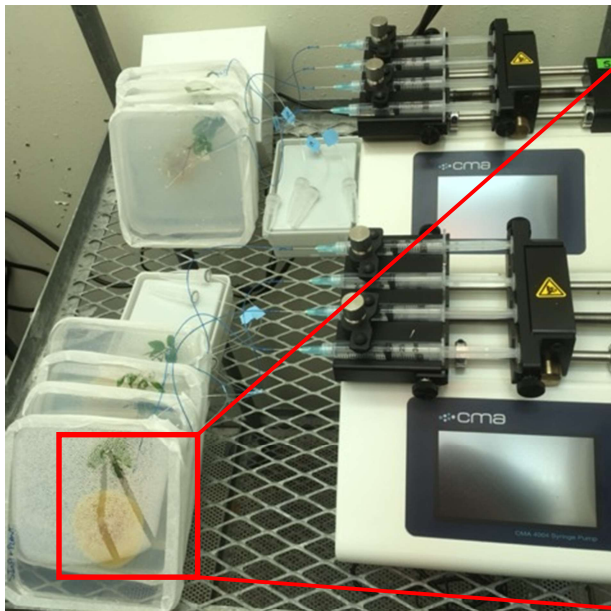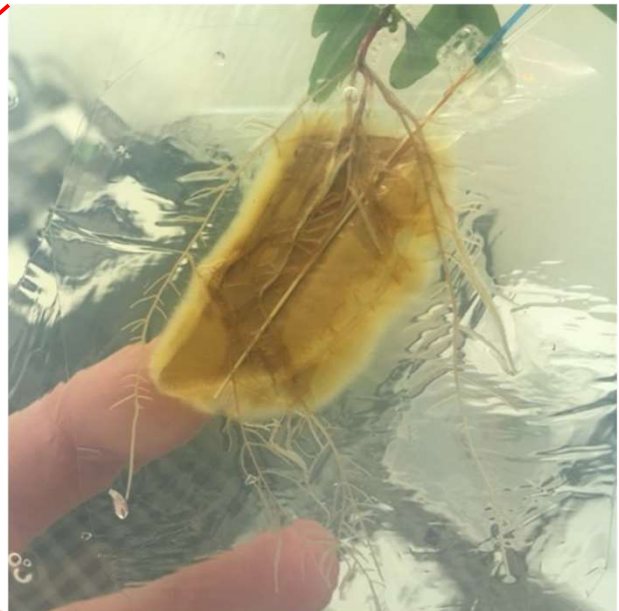

Figure S1: Experimental setup for sampling of metabolites of *E. grandis* and *P. microcarpus* using microdialysis probes.
