# Supplementary material for: Novel Microdialysis Technique Reveals a Dramatic Shift in Metabolite Secretion during the Early Stages of the Interaction between the Ectomycorrhizal Fungus Pisolithus microcarpus and Its Host Eucalyptus grandis
Source: MDPI journal article supplement (doi:10.3390/microorganisms9091817), 2021-08-26
Supplement: s1 [file s1]

**Table S1.** Results of principal components analyses (PCA) and orthogonal partial least squares discriminatory analyses (OPLS-DA) for 560 features measured with negative ion mode (ESI-).

| Component              | R2x(cum) | Eigenvalue | R2y(cum) | Q2(cum) |
|------------------------|----------|------------|----------|---------|
| PCA                    |          |            |          |         |
| 1                      | 0.677    | 17.6       |          | 0.638   |
| 2                      | 0.771    | 2.45       |          | 0.727   |
| OPLS-DA                |          |            |          |         |
| 1                      | 0.675    | 17.6       | 0.421    | 0.0292  |
| 2                      | 0.769    | 2.42       | 1        | 0.538   |
| <i>Orthog. Comp. 1</i> | na.      |            |          |         |

**Table S2.** Results of principal components analyses (PCA) and orthogonal partial least squares discriminatory analyses (OPLS-DA) for 1530 features measured with positive ion mode (ESI+).

| Component              | R2x(cum) | Eigenvalue | R2y(cum) | Q2(cum) |
|------------------------|----------|------------|----------|---------|
| PCA                    |          |            |          |         |
| 1                      | 0.655    | 16.4       |          | 0.516   |
| 2                      | 0.744    | 2.24       |          | 0.467   |
| OPLS-DA                |          |            |          |         |
| 1                      | 0.564    | 14.1       | 0.413    | 0.262   |
| 2                      | 0.604    | 0.986      | 1        | 0.662   |
| <i>Orthog. Comp. 1</i> | 0.141    | 3.53       |          |         |

**Table S3.** List of top 20 putative molecular features associated with each condition (Fungus, Plant, Indirect Contact), sorted by variable-in-project scores from OPLS-DA analyses.

| Negative Mode           |        |       |                     |                                          |
|-------------------------|--------|-------|---------------------|------------------------------------------|
| RT (Mins)               | m/z    | VIP   | Putative Class      | Putative ID                              |
| <b>Fungus</b>           |        |       |                     |                                          |
| 2.90                    | 763.69 | 0.931 | Unknown             | Unknown                                  |
| 4.51                    | 782.67 | 0.927 | Unknown             | Unknown                                  |
| 1.25                    | 741.17 | 0.925 | Unknown             | Unknown                                  |
| 0.86                    | 708.62 | 0.875 | Unknown             | Unknown                                  |
| 2.93                    | 519.71 | 0.866 | Unknown             | Unknown                                  |
| 6.66                    | 675.58 | 0.832 | Unknown             | Unknown                                  |
| 3.18                    | 503.74 | 0.821 | Unknown             | Unknown                                  |
| 0.38                    | 427.81 | 0.811 | Unknown             | Unknown                                  |
| 3.36                    | 680.74 | 0.808 | Unknown             | Unknown                                  |
| 2.64                    | 714.69 | 0.795 | Unknown             | Unknown                                  |
| 2.77                    | 730.64 | 0.777 | Unknown             | Unknown                                  |
| 4.50                    | 794.66 | 0.766 | Unknown             | Unknown                                  |
| 3.39                    | 760.65 | 0.741 | Unknown             | Unknown                                  |
| 3.51                    | 496.77 | 0.681 | Unknown             | Unknown                                  |
| 2.86                    | 593.72 | 0.664 | Unknown             | Unknown                                  |
| 2.92                    | 796.60 | 0.663 | Phospholipid        | Phosphatidylethanolamine alkyl 18:0-20:0 |
| 4.96                    | 590.82 | 0.606 | Unknown             | Unknown                                  |
| 2.87                    | 603.73 | 0.599 | Unknown             | Unknown                                  |
| 2.49                    | 810.62 | 0.585 | Lipid               | Ceramide phosphate d19:0/26:0            |
| 2.75                    | 605.69 | 0.522 | Unknown             | Unknown                                  |
| <b>Plant</b>            |        |       |                     |                                          |
| <i>Na.</i>              |        |       |                     |                                          |
| <b>Indirect Contact</b> |        |       |                     |                                          |
| 3.31                    | 317.53 | 1.736 | Unknown             | Unknown                                  |
| 3.31                    | 318.04 | 1.732 | Unknown             | Unknown                                  |
| 2.96                    | 153.02 | 1.729 | Unknown             | Unknown                                  |
| 2.96                    | 153.36 | 1.724 | Unknown             | Unknown                                  |
| 3.59                    | 367.21 | 1.717 | Lipid               | Unknown                                  |
| 3.27                    | 261.01 | 1.716 | Unknown             | Unknown                                  |
| 3.31                    | 115.03 | 1.716 | Unknown             | Unknown                                  |
| 3.59                    | 412.05 | 1.714 | Unknown             | Unknown                                  |
| 2.09                    | 177.08 | 1.712 | Quaternary Ammonium | Carnetinamide                            |
| 3.12                    | 433.02 | 1.709 | Phenylpropanoid     | Unknown                                  |
| 2.96                    | 242.92 | 1.709 | Unknown             | Unknown                                  |
| 3.65                    | 257.08 | 1.709 | Unknown             | Unknown                                  |
| 3.47                    | 687.09 | 1.703 | Nucleoside          | Unknown                                  |

| RT (Mins) | m/z    | VIP   | Putative Class  | Putative ID                   |
|-----------|--------|-------|-----------------|-------------------------------|
| 3.59      | 412.22 | 1.702 | Unknown         | Unknown                       |
| 3.48      | 203.06 | 1.698 | Unknown         | Unknown                       |
| 3.52      | 396.05 | 1.698 | Unknown         | Unknown                       |
| 2.96      | 151.01 | 1.698 | Unknown         | Unknown                       |
| 3.59      | 411.60 | 1.698 | Phenylpropanoid | Flavonoid                     |
| 3.31      | 274.05 | 1.697 | Unknown         | Unknown                       |
| 3.31      | 317.18 | 1.694 | Fatty Acid      | N-dodecanoyl-hydroxyglycinate |

## Positive Mode

| Fungus |         |       |              |                                                                                      |
|--------|---------|-------|--------------|--------------------------------------------------------------------------------------|
| 4.50   | 404.34  | 1.226 | Fatty Acid   | Unknown                                                                              |
| 3.62   | 641.04  | 1.208 | Unknown      | Unknown                                                                              |
| 3.50   | 1075.10 | 1.190 | Unknown      | Unknown                                                                              |
| 0.41   | 654.86  | 1.187 | Unknown      | Unknown                                                                              |
| 3.49   | 1106.06 | 1.186 | Unknown      | Unknown                                                                              |
| 0.41   | 758.82  | 1.186 | Unknown      | Unknown                                                                              |
| 4.29   | 493.08  | 1.177 | Unknown      | Unknown                                                                              |
| 0.43   | 379.84  | 1.177 | Unknown      | Unknown                                                                              |
| 1.18   | 152.16  | 1.158 | Unknown      | Unknown                                                                              |
| 0.43   | 630.77  | 1.152 | Unknown      | Unknown                                                                              |
| 3.46   | 489.03  | 1.151 | Nucleotide   | Guanosine-5'-phosphate-2',3'-cyclic phosphate                                        |
| 0.62   | 587.16  | 1.148 | Azole        | 1-[4-(4-chlorophenyl)thiazol-2-yl]-2-(pentan-3-ylidene)hydrazine                     |
| 0.99   | 304.09  | 1.146 | Dipeptide    | Unknown                                                                              |
| 4.10   | 671.07  | 1.146 | Unknown      | Unknown                                                                              |
| 4.00   | 685.08  | 1.145 | Flavonoid    | Unknown                                                                              |
| 2.71   | 709.25  | 1.142 | Carboxamide  | N(2)-[(2Z)-2-(2-amino-1,3-thiazol-4-yl)-2-(methoxyimino)acetyl]-N-butyl-L-serinamide |
| 3.47   | 367.02  | 1.140 | Unknown      | Unknown                                                                              |
| 2.26   | 697.21  | 1.136 | Diarylether  | Ampicillin                                                                           |
| 0.68   | 170.44  | 1.136 | Unknown      | Unknown                                                                              |
| 3.80   | 450.06  | 1.135 | Unknown      | Unknown                                                                              |
| Plant  |         |       |              |                                                                                      |
| 1.34   | 379.87  | 1.760 | Unknown      | Unknown                                                                              |
| 0.50   | 294.01  | 1.739 | Organic Acid | 2,2-dichloro-1-phenylcyclopropanecarboxylic acid                                     |
| 3.41   | 439.77  | 1.673 | Unknown      | Unknown                                                                              |
| 3.58   | 395.56  | 1.604 | Unknown      | Unknown                                                                              |
| 3.00   | 849.54  | 1.454 | Unknown      | Unknown                                                                              |
| 3.31   | 261.50  | 1.439 | Unknown      | Unknown                                                                              |
| 0.45   | 687.73  | 1.438 | Unknown      | Unknown                                                                              |

| RT (Mins)               | m/z     | VIP   | Putative Class      | Putative ID                                                                                                  |
|-------------------------|---------|-------|---------------------|--------------------------------------------------------------------------------------------------------------|
| 0.44                    | 636.74  | 1.378 | Unknown             | Unknown                                                                                                      |
| 4.58                    | 576.37  | 1.299 | Carbohydrate        | 2-O-palmitoyl-3-O-[(2E,4S,6S,8S,10S)-2,4,6,8,10-pentamethylhexacos-2-enoyl]-2'-O-sulfo-alpha,alpha-trehalose |
| 8.61                    | 1024.67 | 1.294 | Unknown             | Unknown                                                                                                      |
| 0.44                    | 484.79  | 1.230 | Unknown             | Unknown                                                                                                      |
| 8.74                    | 567.36  | 1.219 | Organic Acid        | Unknown                                                                                                      |
| 3.31                    | 499.00  | 1.217 | Nucleotide          | Unknown                                                                                                      |
| 8.62                    | 475.28  | 1.206 | Lipid               | Lipid A                                                                                                      |
| 0.50                    | 494.01  | 1.205 | Nucleoside          | Ethyl cytidine triphosphate                                                                                  |
| 0.45                    | 348.82  | 1.092 | Unknown             | Unknown                                                                                                      |
| 4.45                    | 561.36  | 0.764 | Glycerophospholipid | Unknown                                                                                                      |
| 3.13                    | 647.37  | 0.728 | Glycerophospholipid | Unknown                                                                                                      |
| 6.80                    | 628.31  | 0.561 | Unknown             | Unknown                                                                                                      |
| 3.36                    | 652.39  | 0.558 | Unknown             | Unknown                                                                                                      |
| <b>Indirect Contact</b> |         |       |                     |                                                                                                              |
| 3.63                    | 565.15  | 2.226 | Flavonoid           | Unknown                                                                                                      |
| 2.79                    | 1039.06 | 2.214 | Unknown             | Unknown                                                                                                      |
| 0.50                    | 561.24  | 2.118 | Alkaloid            | Hydroxyisodolichantoside                                                                                     |
| 0.50                    | 543.24  | 2.077 | Fatty Acid          | Unknown                                                                                                      |
| 5.78                    | 367.37  | 1.982 | Lipid               | Campestanol                                                                                                  |
| 3.95                    | 454.12  | 1.925 | Unknown             | Unknown                                                                                                      |
| 3.09                    | 432.56  | 1.897 | Unknown             | Unknown                                                                                                      |
| 3.09                    | 432.86  | 1.879 | Unknown             | Unknown                                                                                                      |
| 3.49                    | 513.04  | 1.850 | Organic Acid        | Unknown                                                                                                      |
| 4.12                    | 471.12  | 1.796 | Unknown             | Unknown                                                                                                      |
| 2.79                    | 629.15  | 1.790 | Carbohydrate        | Unknown                                                                                                      |
| 6.75                    | 607.39  | 1.721 | Unknown             | Unknown                                                                                                      |
| 3.51                    | 460.04  | 1.689 | Unknown             | Unknown                                                                                                      |
| 2.45                    | 274.04  | 1.680 | Unknown             | Unknown                                                                                                      |
| 0.50                    | 517.22  | 1.643 | Unknown             | Unknown                                                                                                      |
| 3.16                    | 496.06  | 1.642 | Unknown             | Unknown                                                                                                      |
| 5.35                    | 583.36  | 1.582 | Unknown             | Unknown                                                                                                      |
| 3.60                    | 412.04  | 1.568 | Phenylpropanoid     | {2,6-dimethoxy-4-[3-oxo-3-(2,4,6-trihydroxyphenyl)prop-1-en-1-yl]phenyl}oxidanesulfonic acid                 |
| 3.04                    | 110.04  | 1.553 | Unknown             | Unknown                                                                                                      |
| 6.94                    | 608.39  | 1.538 | Prenyl Lipid        | Ganoderic acid                                                                                               |
